# Supplementary material
Source: PubMed Central journal article supplement (PMC10038665)
Supplement: mmc1.pdf [file mmc1.pdf]

# THE LANCET Microbe

## Supplementary appendix

This appendix formed part of the original submission and has been peer reviewed. We post it as supplied by the authors.

Supplement to: Traut CC, Blankson JN. Bivalent mRNA vaccine-elicited SARS-CoV-2 specific T cells recognise the omicron XBB sublineage. *Lancet Microbe* 2023; published online March 24. [https://doi.org/10.1016/S2666-5247\(23\)00105-2](https://doi.org/10.1016/S2666-5247(23)00105-2).

**A**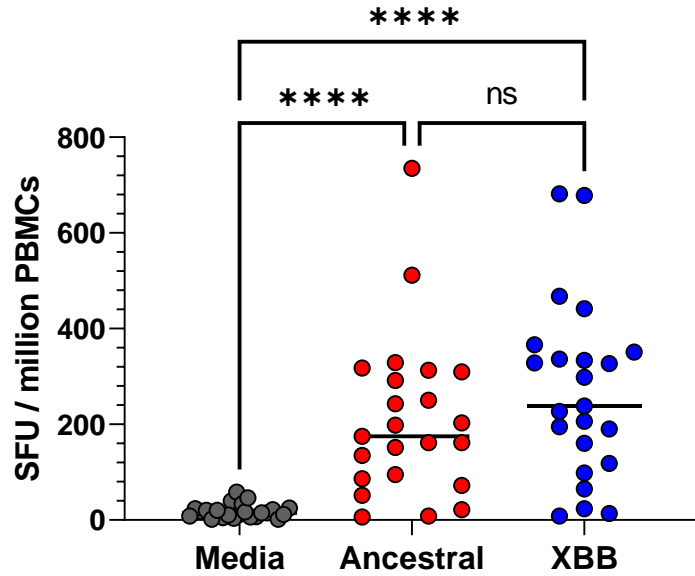**B**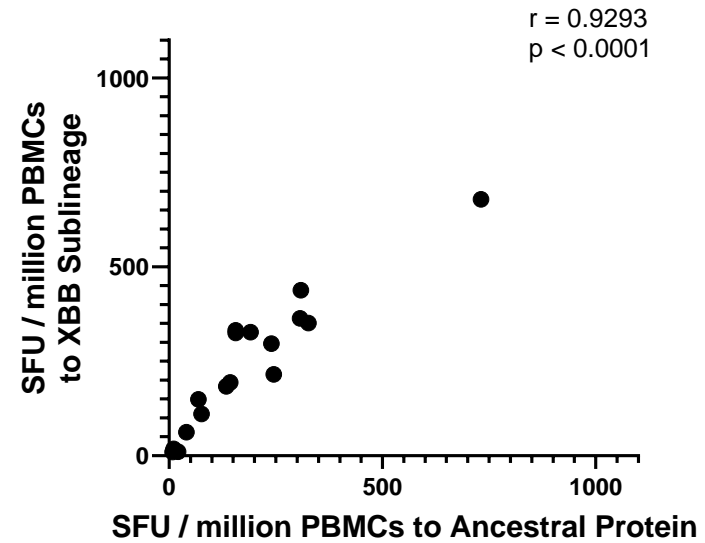**Supplementary Figure: T cell responses to Ancestral and XBB spike proteins.**

(A) The number of spot forming units (SFU) per million PBMCs in response to media and both spike proteins. (B) The correlation between the number of SFU elicited in response to the spike proteins.
